# Supplementary material
Source: PubMed Central journal article supplement (PMC4076354)
Supplement: supp_113.110551_biolreprod.113.110551-1.pdf [file supp_113.110551_biolreprod.113.110551-1.pdf]

Enhanced Cellular Responses and Distinct Gene Profiles  
in Human Fetoplacental Artery Endothelial Cells under Chronic Low Oxygen

Yi-Zhou Jiang, Kai Wang, Yan Li, Cai-Feng Dai, Ping Wang,  
Christina Kendziorski, Dong-Bao Chen, Jing Zheng

**Supplemental Methods**

*CD31 Analysis and FACS Sorting*

The cells were gently pipetted after trypsin treatment to dissociate cells into single cell suspension. The cells were then incubated with a mouse monoclonal anti-human CD31 antibody conjugated with R-phycoerythrin (PE) (1  $\mu\text{g}/10^7$  cells, Pharmingen, San Diego, CA) for 30 min at 4 °C. After washing, the cells were resuspended in PBS. Pre-immune mouse IgG conjugated with PE was used in parallel as a negative control. The cells were then sorted with propidium iodide to exclude dead cells on a high-speed Vantage SE sorting cytometer (BD Biosciences, San Jose, CA) with CellQuest and/or the DiVa software at the Carbone Cancer Center, the University of Wisconsin-Madison.

*Ac-LDL Uptake Assay*

The cells were incubated with Ac-LDL labeled with 1,1'-dioctadecyl-3,3,3',3'-tetramethylindocarbocyanine perchlorate (DiI-Ac-LDL, 10  $\mu\text{g}/\text{mL}$ , Biomedical Technologies, Stoughton, MA) for 4 hr at 37°C, fixed in 4% formaldehyde, and examined under a phase-contrast and fluorescent microscope. Images were taken under a Nikon TE2000U inverted microscope connected to a Spot Insight QE CCD camera using the SPOT advanced image analysis software. The cells exhibiting uptake of LDL were counted. The cells incubated without DiI-Ac-LDL were served as negative controls.

*Capillary-Like Tube Formation Assay*

Growth factor-reduced Matrigel matrix (300  $\mu\text{L}$ ; BD Biosciences) was applied to 24-well plate and allowed to polymerize for 30 min at 37 °C. The cells were seeded ( $8 \times 10^4$  cells/well) and incubated under 21% or 3% O<sub>2</sub> for 2 and 24 hr. The capillary-like tube structures were recorded under the microscope.

Table S1. Primers used for qPCR analysis.

| Gene Symbol    | Probe Sets   | Forward Primer           | Reverse Primer           |
|----------------|--------------|--------------------------|--------------------------|
| <i>CLDN10</i>  | 205328_at    | TTGATCCTCTCTTTGTTGAGCA   | AAGCAAAATATGACACCACCAA   |
| <i>GIPC2</i>   | 219970_at    | ATGGAAAATGCTGTGTGCTG     | CAGCTTCTGTGCAGATTTCAA    |
| <i>ADAMTS1</i> | 222486_s_at  | TGAGGCAAGGCAAAGTGAG      | ACTGGCAAGATACGCTGGAT     |
| <i>HES1</i>    | 203395_s_at  | TTACGGCGGACTCCATGT       | AGAGGTGGGTTGGGGAGT       |
| <i>VEGFC</i>   | 209946_at    | AAGTCCACAGAAATGCTTGTTAAA | TCGTACATGGCCGTCTGTAA     |
| <i>HS6ST2</i>  | 1552767_a_at | ATTGCTGTGGTGTGCATGAT     | AAGCTACACCAATGGACAGATG   |
| <i>TFEC</i>    | 206715_at    | TGAAAACTGATAGAAGCAACAGAA | CGCCCTCAATAATTCATTAACA   |
| <i>VEGFA</i>   | 210512_s_at  | TGCAGATTATGCGGATCAAACC   | TGCATTACATTTGTTGTGCTGTAG |
| <i>AK3L1</i>   | 204348_s_at  | GTCCCAGGCTTTCTGGTGT      | GTGGACACAGTCACTCAAGACC   |
| <i>ACTB</i>    | 200801_x_at  | CATTCCAAATATGAGATGCATTG  | TGCTATCACCTCCCCTGTGT     |
| <i>TBP</i>     | 203135_at    | CATACCGTGCTGCTATCTGG     | TCCCTCAAACCAACTTGTC      |

Table S2. Antibodies used for Western-blot analysis.

|    | Antibody       | Vendor                    | Catalog Number | Dilution |
|----|----------------|---------------------------|----------------|----------|
| 1  | $\beta$ -actin | Ambion                    | AM4302         | 1:10000  |
| 2  | BNIP3          | Abcam                     | ab10433        | 1:1000   |
| 3  | CDCP1          | Abcam                     | ab1377         | 1:1000   |
| 4  | FGFR1          | Invitrogen                | 37-9200        | 1:1000   |
| 5  | FGFR2          | Cell Signaling Technology | 3116           | 1:500    |
| 6  | SLC2A3         | Abcam                     | ab15311        | 1:500    |
| 7  | HIF-1 $\alpha$ | BD Bioscience             | 610959         | 1:500    |
| 8  | HIF-2 $\alpha$ | Novus                     | NB100-122      | 1:500    |
| 9  | NOS3           | BD Bioscience             | 610297         | 1:1000   |
| 10 | VEGFR1         | Millipore                 | 05-696         | 1:1000   |
| 11 | VEGFR2         | Cell Signaling Technology | 2479           | 1:1000   |

Table S3. PCN-Induced DE Genes with fold changes &lt; 2 in HUAECs.

| #  | Gene Symbol<br>/Probe sets | Gene Name                                                           | Fold<br>Increase |
|----|----------------------------|---------------------------------------------------------------------|------------------|
| 1  | <i>ANKRD37</i>             | ankyrin repeat domain 37                                            | 1.9              |
| 2  | <i>C1orf21</i>             | chromosome 1 open reading frame 21                                  | 1.9              |
| 3  | <i>C9orf64</i>             | chromosome 9 open reading frame 64                                  | 1.9              |
| 4  | <i>CEBPD</i>               | CCAAT/enhancer binding protein (C/EBP), delta                       | 1.9              |
| 5  | <i>COBLL1</i>              | COBL-like 1                                                         | 1.9              |
| 6  | <i>SEPP1</i>               | selenoprotein P, plasma, 1                                          | 1.9              |
| 7  | <i>AEBP1</i>               | AE binding protein 1                                                | 1.8              |
| 8  | <i>ARL10</i>               | ADP-ribosylation factor-like 10                                     | 1.8              |
| 9  | <i>LOX</i>                 | lysyl oxidase                                                       | 1.8              |
| 10 | <i>PDK1</i>                | pyruvate dehydrogenase kinase, isozyme 1                            | 1.8              |
| 11 | <i>REC8</i>                | REC8 homolog (yeast)                                                | 1.8              |
| 12 | <i>SEC16B</i>              | SEC16 homolog B ( <i>S. cerevisiae</i> )                            | 1.8              |
| 13 | <i>SSX2IP</i>              | synovial sarcoma, X breakpoint 2 interacting protein                | 1.8              |
| 14 | <i>DNAJA4</i>              | DnaJ (Hsp40) homolog, subfamily A, member 4                         | 1.7              |
| 15 | <i>KLF11</i>               | Kruppel-like factor 11                                              | 1.7              |
| 16 | <i>NEFH</i>                | neurofilament, heavy polypeptide 200kDa                             | 1.7              |
| 17 | <i>SLC2A3</i>              | solute carrier family 2 (facilitated glucose transporter), member 3 | 1.7              |
| 18 | <i>TXNIP</i>               | thioredoxin interacting protein                                     | 1.7              |
| 19 | <i>PLIN2</i>               | perilipin 2                                                         | 1.6              |
| 20 | <i>ADPRH</i>               | ADP-ribosylarginine hydrolase                                       | 1.6              |
| 21 | <i>ANKRD41</i>             | ankyrin repeat domain 41                                            | 1.6              |
| 22 | <i>C2orf55</i>             | chromosome 2 open reading frame 55                                  | 1.6              |
| 23 | <i>HK2</i>                 | hexokinase 2                                                        | 1.6              |
| 24 | <i>OR2A7</i>               | olfactory receptor, family 2, subfamily A, member 7                 | 1.6              |
| 25 | <i>STX11</i>               | syntaxin 11                                                         | 1.6              |
| 26 | <i>TRIM14</i>              | tripartite motif-containing 14                                      | 1.6              |
| 27 | <i>TUBA4A</i>              | tubulin, alpha 4a                                                   | 1.6              |
| 28 | <i>VEGFA</i>               | vascular endothelial growth factor A                                | 1.6              |
| 29 | <i>241835_at</i>           | N.A.                                                                | 1.5              |
| 30 | <i>242582_at</i>           | N.A.                                                                | 1.5              |
| 31 | <i>FAM115C</i>             | family with sequence similarity 115, member C                       | 1.5              |
| 32 | <i>FOLH1</i>               | folate hydrolase (prostate-specific membrane antigen) 1             | 1.5              |
| 33 | <i>PION</i>                | pigeon homolog ( <i>Drosophila</i> )                                | 1.5              |
| 34 | <i>SERTAD2</i>             | SERTA domain containing 2                                           | 1.5              |
| 35 | <i>SHISA3</i>              | shisa homolog 3 ( <i>Xenopus laevis</i> )                           | 1.5              |
| 36 | <i>DNMT3A</i>              | DNA (cytosine-5-)-methyltransferase 3 alpha                         | 1.4              |
| 37 | <i>EZR</i>                 | ezrin                                                               | 1.4              |
| 38 | <i>FAM108C1</i>            | family with sequence similarity 108, member C1                      | 1.4              |
| 39 | <i>MCCC2</i>               | methylcrotonoyl-Coenzyme A carboxylase 2 (beta)                     | 1.4              |
| 40 | <i>MET</i>                 | met proto-oncogene (hepatocyte growth factor receptor)              | 1.4              |
| 41 | <i>OSBPL3</i>              | oxysterol binding protein-like 3                                    | 1.4              |
| 42 | <i>FUT11</i>               | fucosyltransferase 11 (alpha (1,3) fucosyltransferase)              | 1.3              |

| #  | Gene Symbol<br>/Probe sets | Gene Name                                                                                         | Fold<br>Decrease |
|----|----------------------------|---------------------------------------------------------------------------------------------------|------------------|
| 1  | <i>C6orf138</i>            | chromosome 6 open reading frame 138                                                               | -1.9             |
| 2  | <i>GZMA</i>                | granzyme A (granzyme 1, cytotoxic T-lymphocyte-associated serine esterase 3)                      | -1.9             |
| 3  | <i>228740_at</i>           | N.A.                                                                                              | -1.9             |
| 4  | <i>RBM24</i>               | RNA binding motif protein 24                                                                      | -1.9             |
| 5  | <i>BCL2</i>                | B-cell CLL/lymphoma 2                                                                             | -1.8             |
| 6  | <i>DLC1</i>                | deleted in liver cancer 1                                                                         | -1.8             |
| 7  | <i>MLF1</i>                | myeloid leukemia factor 1                                                                         | -1.8             |
| 8  | <i>FBXO32</i>              | F-box protein 32                                                                                  | -1.8             |
| 9  | <i>LOC100505702</i>        | uncharacterized LOC100505702                                                                      | -1.8             |
| 10 | <i>PAPPA</i>               | pregnancy-associated plasma protein A, pappalysin 1                                               | -1.8             |
| 11 | <i>PARD6G</i>              | par-6 partitioning defective 6 homolog gamma ( <i>C. elegans</i> )                                | -1.8             |
| 12 | <i>PPAPDC1A</i>            | phosphatidic acid phosphatase type 2 domain containing 1A                                         | -1.8             |
| 13 | <i>SELM</i>                | selenoprotein M                                                                                   | -1.8             |
| 14 | <i>UST</i>                 | uronyl-2-sulfotransferase                                                                         | -1.8             |
| 15 | <i>ADORA3</i>              | adenosine A3 receptor                                                                             | -1.7             |
| 16 | <i>BPGM</i>                | 2,3-bisphosphoglycerate mutase                                                                    | -1.7             |
| 17 | <i>BVES</i>                | blood vessel epicardial substance                                                                 | -1.7             |
| 18 | <i>C1orf187</i>            | chromosome 1 open reading frame 187                                                               | -1.7             |
| 19 | <i>HS6ST2</i>              | heparan sulfate 6-O-sulfotransferase 2                                                            | -1.7             |
| 20 | <i>ITM2C</i>               | integral membrane protein 2C                                                                      | -1.7             |
| 21 | <i>230537_at</i>           | N.A.                                                                                              | -1.7             |
| 22 | <i>RELN</i>                | reelin                                                                                            | -1.7             |
| 23 | <i>SMPDL3A</i>             | sphingomyelinphosphodiesterase, acid-like 3A                                                      | -1.7             |
| 24 | <i>SPG3A</i>               | spastic paraplegia 3A (autosomal dominant)                                                        | -1.7             |
| 25 | <i>TMOD2</i>               | tropomodulin 2 (neuronal)                                                                         | -1.7             |
| 26 | <i>C4orf34</i>             | chromosome 4 open reading frame 34                                                                | -1.6             |
| 27 | <i>CEP135</i>              | centrosomal protein 135kDa                                                                        | -1.6             |
| 28 | <i>CREG1</i>               | cellular repressor of E1A-stimulated genes 1                                                      | -1.6             |
| 29 | <i>EDN1</i>                | endothelin 1                                                                                      | -1.6             |
| 30 | <i>GRAP</i>                | GRB2-related adaptor protein                                                                      | -1.6             |
| 31 | <i>HES1</i>                | hairy and enhancer of split 1, ( <i>Drosophila</i> )                                              | -1.6             |
| 32 | <i>HNMT</i>                | histamine N-methyltransferase                                                                     | -1.6             |
| 33 | <i>MFAP3L</i>              | microfibrillar-associated protein 3-like                                                          | -1.6             |
| 34 | <i>MOV10L1</i>             | Mov1011, Moloney leukemia virus 10-like 1, homolog (mouse)                                        | -1.6             |
| 35 | <i>SMARCD3</i>             | SWI/SNF related, matrix associated, actin dependent regulator of chromatin, subfamily d, member 3 | -1.6             |
| 36 | <i>TMEM112</i>             | transmembrane protein 112                                                                         | -1.6             |
| 37 | <i>CHST11</i>              | carbohydrate (chondroitin 4) sulfotransferase 11                                                  | -1.5             |
| 38 | <i>CORO1A</i>              | coronin, actin binding protein, 1A                                                                | -1.5             |
| 39 | <i>FZD3</i>                | frizzled homolog 3 ( <i>Drosophila</i> )                                                          | -1.9             |
| 40 | <i>IDS</i>                 | iduronate 2-sulfatase (Hunter syndrome)                                                           | -1.5             |
| 41 | <i>KCNMB4</i>              | potassium large conductance calcium-activated channel,                                            | -1.5             |

|    |                 |                                                                        |      |
|----|-----------------|------------------------------------------------------------------------|------|
|    |                 | subfamily M, beta member 4                                             |      |
| 42 | <i>SLC16A2</i>  | solute carrier family 16, member 2 (monocarboxylic acid transporter 8) | -1.5 |
| 43 | <i>SPTA1</i>    | spectrin, alpha, erythrocytic 1 (elliptocytosis 2)                     | -1.5 |
| 44 | <i>TANK</i>     | TRAF family member-associated NFkB activator                           | -1.5 |
| 45 | <i>TMEM11</i>   | transmembrane protein 11                                               | -1.5 |
| 46 | <i>TNFRSF21</i> | tumor necrosis factor receptor superfamily, member 21                  | -1.5 |
| 47 | <i>ULBP2</i>    | UL16 binding protein 2                                                 | -1.5 |
| 48 | <i>C15orf52</i> | chromosome 15 open reading frame 52                                    | -1.4 |
| 49 | <i>CAMK2N1</i>  | calcium/calmodulin-dependent protein kinase II inhibitor 1             | -1.4 |
| 50 | <i>CYFIP2</i>   | cytoplasmic FMR1 interacting protein 2                                 | -1.4 |
| 51 | <i>MYO10</i>    | myosin X                                                               | -1.4 |
| 52 | <i>CAMK2N2</i>  | calcium/calmodulin-dependent protein kinase II inhibitor 2             | -1.3 |
| 53 | <i>NPL</i>      | N-acetylneuraminase pyruvate lyase (dihydrodipicolinate synthase)      | -1.3 |

---

*Note:* The fold change was the mean of fold change of probe sets. N.A.= no annotation.

Table S4. IPA of cellular functions for PCN-induced DE genes in HUAECs.

| Functions Annotation                            | <i>p</i> -Value | Activation z-score |
|-------------------------------------------------|-----------------|--------------------|
| <i>A. Cellular Movement</i>                     |                 |                    |
| Cell movement of ovarian cancer cell lines      | 8.8E-06         | 0.603              |
| Cell movement of cancer cells                   | 3.1E-05         | -0.026             |
| Invasion of tumor cell lines                    | 3.1E-05         | -0.065             |
| Cell movement                                   | 1.0E-04         | -0.137             |
| Cell movement of tumor cell lines               | 1.2E-03         | -0.227             |
| Invasion of tumor cells                         | 1.8E-04         | -0.243             |
| Invasion of cancer cells                        | 5.1E-05         | -0.283             |
| Cell movement of breast cell lines              | 1.3E-03         | -0.283             |
| Invasion of ovarian cancer cell lines           | 1.7E-07         | -0.896             |
| Migration of tumor cell lines                   | 2.9E-03         | -1.069             |
| Migration of cells                              | 3.7E-04         | -1.242             |
| <i>B. Cellular Development</i>                  |                 |                    |
| Proliferation of ovarian cancer cell lines      | 1.4E-03         | 1.109              |
| Adipogenesis of cells                           | 4.4E-03         | 0.975              |
| Proliferation of cancer cells                   | 7.3E-03         | 0.530              |
| Differentiation of osteoblasts                  | 1.7E-03         | 0.339              |
| Proliferation of hematopoietic progenitor cells | 6.8E-04         | 0.103              |
| Proliferation of tumor cell lines               | 1.4E-03         | -0.083             |
| Proliferation of blood cells                    | 1.5E-05         | -0.185             |
| Proliferation of bone marrow cells              | 4.0E-03         | -0.391             |
| Proliferation of immune cells                   | 5.8E-04         | -0.703             |
| Proliferation of stem cells                     | 6.1E-03         | -0.762             |
| Differentiation of tumor cell lines             | 4.5E-03         | -1.103             |
| Proliferation of lymphocytes                    | 1.7E-03         | -1.248             |
| Differentiation of cells                        | 2.0E-03         | -1.399             |
| Proliferation of melanoma cell lines            | 4.9E-05         | -1.408             |
| Proliferation of T lymphocytes                  | 5.9E-03         | -1.464             |
| <i>C. Cellular Growth and Proliferation</i>     |                 |                    |
| Proliferation of ovarian cancer cell lines      | 1.4E-03         | 1.109              |
| Proliferation of cancer cells                   | 7.3E-03         | 0.530              |
| Colony formation of tumor cell lines            | 4.3E-03         | 0.479              |
| Colony formation of cells                       | 2.3E-03         | 0.178              |
| Proliferation of hematopoietic progenitor cells | 6.8E-04         | 0.103              |
| Proliferation of tumor cell lines               | 1.4E-03         | -0.083             |
| Proliferation of blood cells                    | 1.5E-05         | -0.185             |
| Proliferation of cells                          | 5.8E-05         | -0.250             |
| Proliferation of bone marrow cells              | 4.0E-03         | -0.391             |
| Proliferation of immune cells                   | 5.8E-04         | -0.703             |
| Proliferation of stem cells                     | 6.1E-03         | -0.762             |
| Stimulation of cells                            | 5.6E-04         | -0.829             |
| Formation of hematopoietic progenitor cells     | 4.6E-05         | -0.927             |
| Stimulation of lymphocytes                      | 2.0E-04         | -1.000             |

|                                            |         |        |
|--------------------------------------------|---------|--------|
| Formation of blood cells                   | 1.1E-03 | -1.029 |
| Formation of osteoclasts                   | 5.0E-03 | -1.121 |
| Colony formation of blood cells            | 6.0E-03 | -1.231 |
| Proliferation of lymphocytes               | 1.7E-03 | -1.248 |
| Proliferation of melanoma cell lines       | 4.9E-05 | -1.408 |
| Proliferation of T lymphocytes             | 5.9E-03 | -1.464 |
| Formation of cells                         | 1.1E-03 | -1.523 |
| <hr/>                                      |         |        |
| <i>D. Cell Death and Survival</i>          |         |        |
| Cell viability                             | 3.8E-04 | 2.015  |
| Cell survival                              | 4.5E-04 | 1.629  |
| Cell death of neuroglia                    | 2.3E-03 | 1.166  |
| Apoptosis of muscle cell lines             | 7.5E-04 | 1.117  |
| Cell viability of kidney cell lines        | 1.3E-03 | 1.067  |
| Cell viability of tumor cells              | 5.2E-03 | 0.555  |
| Apoptosis of muscle cells                  | 4.7E-03 | 0.431  |
| Cell viability of breast cancer cell lines | 3.7E-03 | 0.394  |
| Cell death of tumor cells                  | 2.5E-03 | 0.378  |
| Apoptosis of embryonic cells               | 5.4E-03 | 0.371  |
| Apoptosis of neuroglia                     | 3.3E-03 | 0.333  |
| Cell death of muscle cells                 | 5.7E-03 | 0.111  |
| Cell death                                 | 3.1E-05 | -0.252 |
| Cell viability of neurons                  | 5.5E-03 | -0.272 |
| Apoptosis of cardiomyocytes                | 2.4E-03 | -0.339 |
| Necrosis                                   | 6.2E-04 | -0.404 |
| Apoptosis of tumor cells                   | 7.2E-03 | -0.422 |
| Apoptosis                                  | 2.8E-04 | -0.452 |
| Cell death of cardiomyocytes               | 1.0E-03 | -0.692 |
| Apoptosis of tumor cell lines              | 4.6E-04 | -1.849 |
| Cell death of tumor cell lines             | 2.7E-03 | -2.236 |
| <hr/>                                      |         |        |
| <i>E. Cell Morphology</i>                  |         |        |
| Sprouting                                  | 6.2E-05 | -1.274 |
| Outgrowth of neurites                      | 1.7E-03 | -0.293 |
| Morphology of cells                        | 1.0E-03 | 1.446  |

*Note:* A positive or negative z-score implies potential activation or inhibition of the pathway.
